# Supplementary material for: Adenosine-to-Inosine Editing of Vasoactive MicroRNAs Alters Their Targetome and Function in Ischemia
Source: PubMed Central journal article supplement — Mol Ther Nucleic Acids. 2020 Jul 21;21:932–53. doi: 10.1016/j.omtn.2020.07.020 (PMC7452086; doi:10.1016/j.omtn.2020.07.020), 2020-07-21
Supplement: mmc1.pdf [file mmc1.pdf]

**OMTN, Volume 21**

## **Supplemental Information**

### **Adenosine-to-Inosine Editing of Vasoactive MicroRNAs Alters Their Targetome and Function in Ischemia**

**Reginald V.C.T. van der Kwast, Laura Parma, M. Leontien van der Bent, Eva van Ingen, Fabiana Baganha, Hendrika A.B. Peters, Eveline A.C. Goossens, Karin H. Simons, Meindert Palmen, Margreet R. de Vries, Paul H.A. Quax, and A. Yaël Nossent**

## SUPPLEMENTAL INFORMATION

### Table of Contents

#### A) Supplemental Figures

- S1 In vitro ischemia conditions induce HIF1A, VEGFA, p53, ADAR1 and ADAR2 expression.
- S2 MicroRNA expression and characterization of the microRNA qRT-PCR assays
- S3 Expression of ADARs *in vitro* after knockdown and *in vivo* after hindlimb ischemia.
- S4 ADAR1 and ADAR2 expression in lower limb veins of patients with peripheral artery disease compared to coronary artery disease.
- S5 Regulation of percentage miRNA editing after overexpression of either a WT-miRNA or an ED-miRNA.
- S6 Overall target gene regulation after overexpression of WT-miR-411-5p or ED-miR-411-5p.
- S7 Expression of validated WT-miRNA and ED-miRNA target gene in lower limb veins of patients with and without peripheral artery disease.
- S8 Identification of vasoactive microRNAs containing tissue specific A-to-I editing

#### B) Supplemental Tables

- S1 MicroRNAs containing A-to-I editable adenosines
- S2 Seed sequence analysis of A-to-I edited pri-miRNAs
- S3 Overview of the findings per selected microRNA
- S4 Enriched pathways within putative targetomes
- S5 Putative targets of WT-miRNAs or ED-miRNAs involved in one or more selected processes related to the response to ischemia
- S6 Number of miR-411-5p targets detected using RNA-seq and regulation of the unique targets
- S7 Number of targets within each targetome and fractions conserved in mice and detected by microarray
- S8 Primer sequences and purpose
- S9 Sequences of WT-miRNA and ED-miRNA specific qRT-PCR assays
- S10 Sequences of siRNA and synthesized endogenous 3'UTRs

#### C) Supplemental References

SUPPLEMENTAL FIGURES AND FIGURE LEGENDS

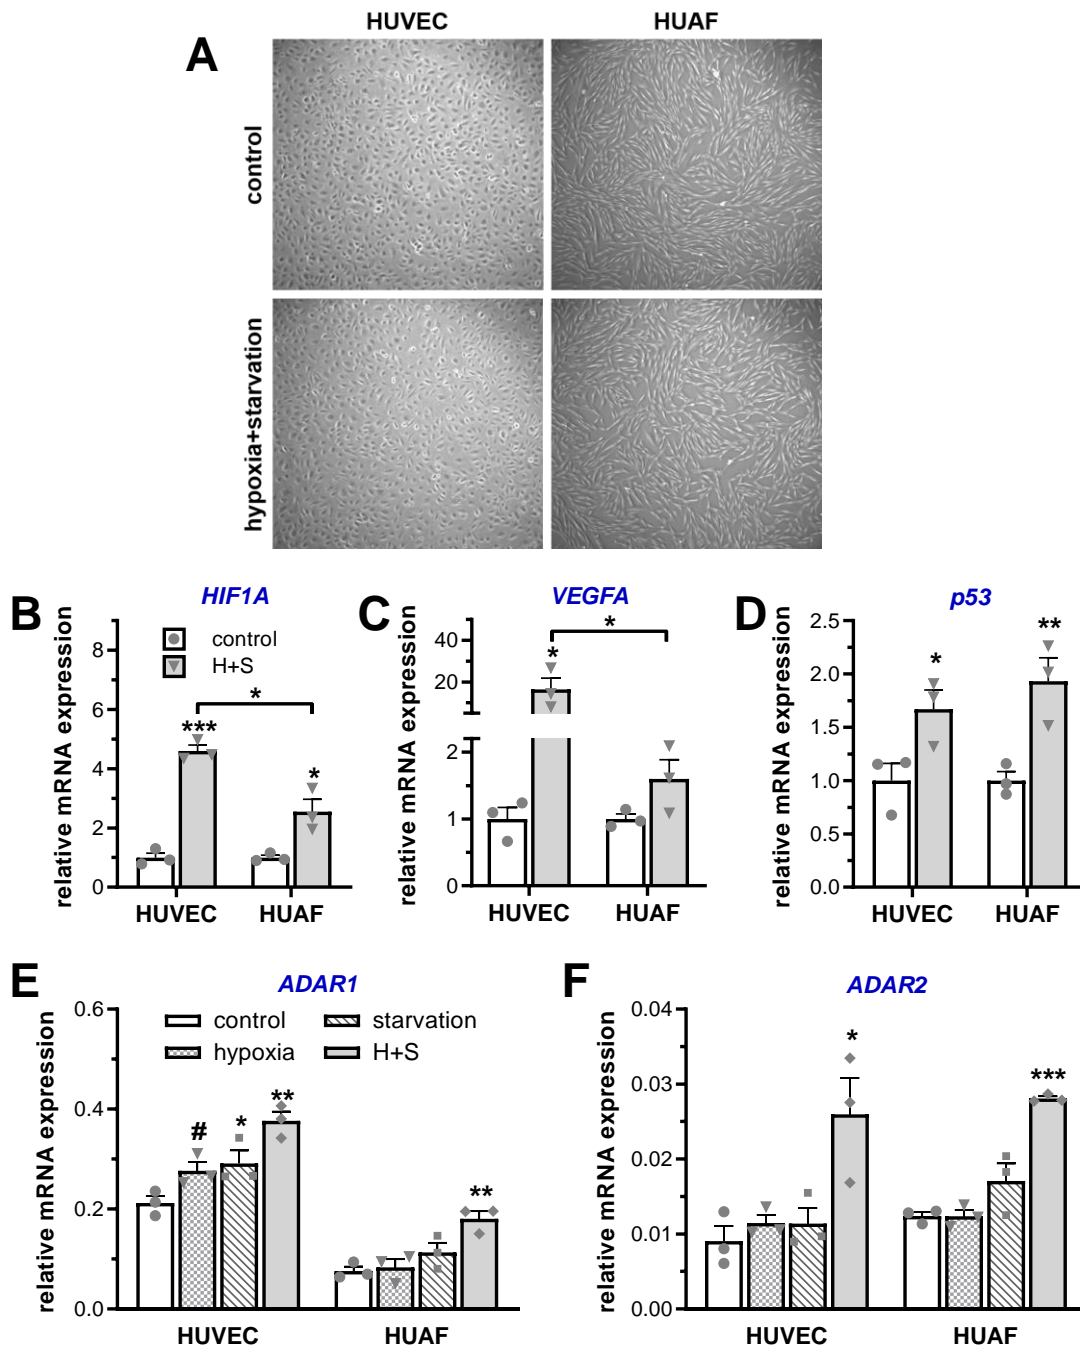

**Figure S1: In vitro ischemia conditions induce HIF1A, VEGFA, p53, ADAR1 and ADAR2 expression.**

(A) Primary human umbilical vascular endothelial cells (HUVECs) and human umbilical arterial fibroblasts (HUAFs) were cultured either under normal or ischemic culture conditions, mimicked using a combination of hypoxia and serum starvation (H+S). Expression of hypoxia-inducible genes HIF1A (B) and VEGFA (C) and p53 (D) were successfully increased upon H+S culture conditions. (D-E) Regulation of ADAR1 (D) and ADAR2 (E) expression in response to either only serum starvation or hypoxia or the combination. All data are presented as mean  $\pm$  SEM (n=3). # $P$ <0.1, \* $P$ <0.05, \*\* $P$ <0.01, \*\*\* $P$ <0.001; versus control condition unless otherwise indicated by 2-sided Student  $t$  test.

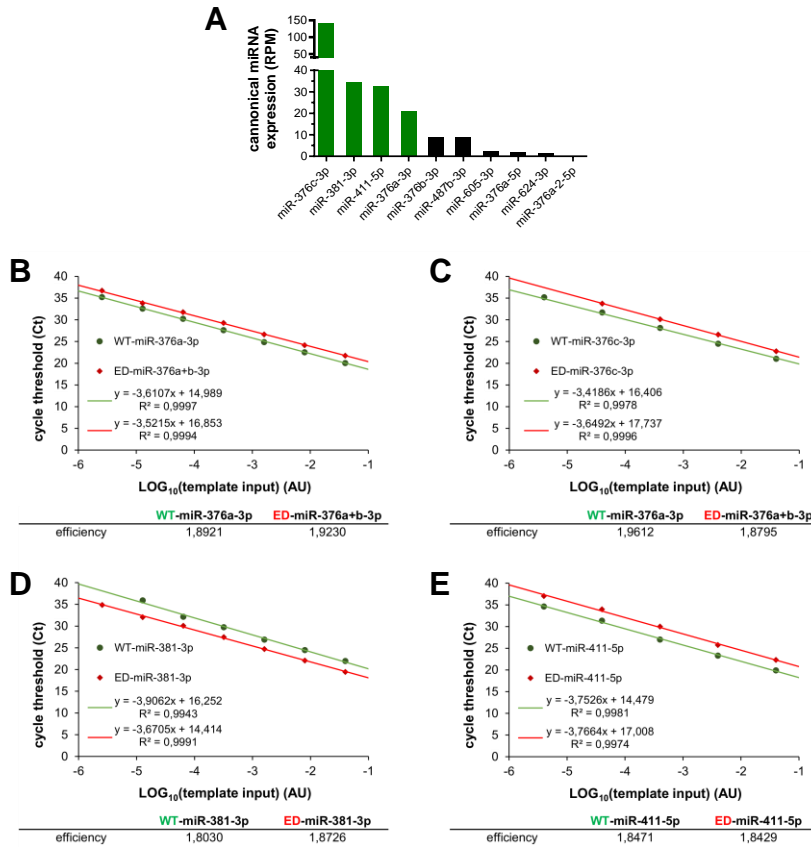

**Figure S2: MicroRNA expression and characterization of the microRNA qRT-PCR assays.** (A) Overall mature miRNA expression in reads per million (RPM) of microRNAs found edited at pri-miRNA level in vascular cells. Data are displayed in descending order and were extrapolated from miRbase.org (only canonical miRNA sequence reads were included). (B-E) Characterization of PCR efficiency of TaqMan WT-miRNA and custom ED-miRNA qRT-PCR kits by serial dilution of cDNA from HUAf samples transfected with 0.1 pg of the miRNA. To do so, cycle threshold was plotted versus the logarithmic function of the relative input. The equation:  $\text{efficiency} = 10^{(-1/\text{slope})}$  was used to calculate the corresponding real-time PCR efficiencies<sup>1</sup>.

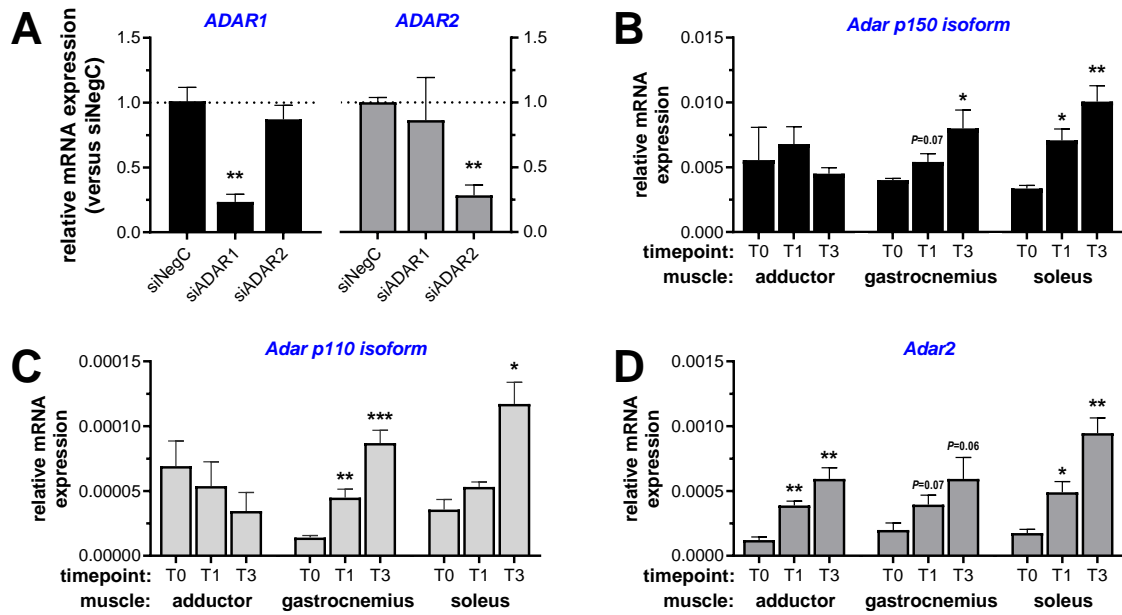

**Figure S3: Expression of ADARs *in vitro* after knockdown and *in vivo* after hindlimb ischemia.** (A) After transfecting HUAFs with a negative control, *ADAR1*-targeted or *ADAR2*-targeted siRNA (siNegC, siADAR1 and siADAR2 respectively), relative expression of *ADAR1* and *ADAR2* was measured by qRT-PCR to validate the knockdown efficiency and specificity. Data was expressed as fold change relative to siNegC and presented as mean  $\pm$ SEM (n=3 per treatment). (B-C) Relative expression of *Adar1* isoforms P150 (B) and P110 (C) and *Adar2* (D) in muscles before hindlimb ischemia (T0) and 1 and 3 days after (T1 and T3 respectively) as determined by qRT-PCR. Data was expressed relative to *Rplp0* and presented as mean  $\pm$ SEM (n=3 per treatment). \* $P < 0.05$ , \*\* $P < 0.01$ , \*\*\* $P < 0.001$ ; versus siNegC or T0 by two-sided Student's *t*-test.

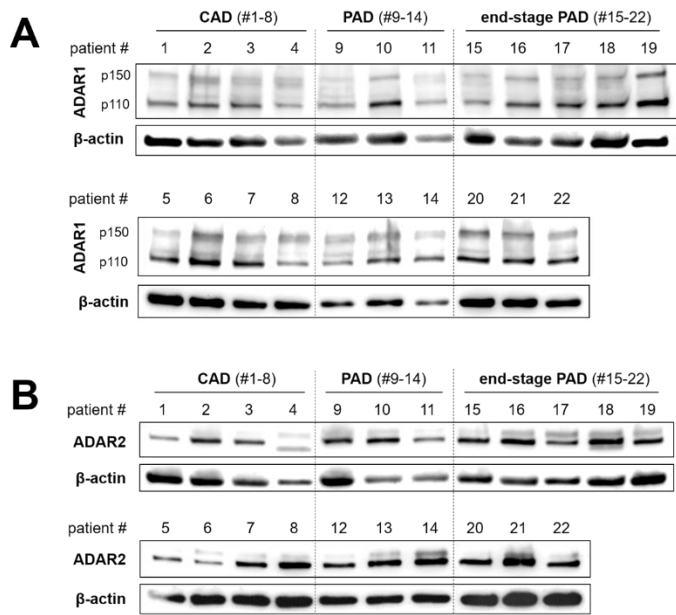

**Figure S4: ADAR1 and ADAR2 expression in lower limb veins of patients with peripheral artery disease compared to coronary artery disease.** Westernblots of ADAR1 (A) and ADAR2 (B) expression in lower leg vein (LLV) samples from different patient groups. Normoxic LLV samples (n=8) from patients with coronary artery disease (CAD) undergoing coronary artery bypass-surgery were compared to ischemic LLV samples (n=6) from patients with peripheral artery disease (PAD) undergoing femoral artery to popliteal artery-bypass surgery and to critically ischemic LLV samples (n=8) from patients with end-stage PAD, undergoing lower limb amputation. Stable household gene beta-actin was used to normalize expression.

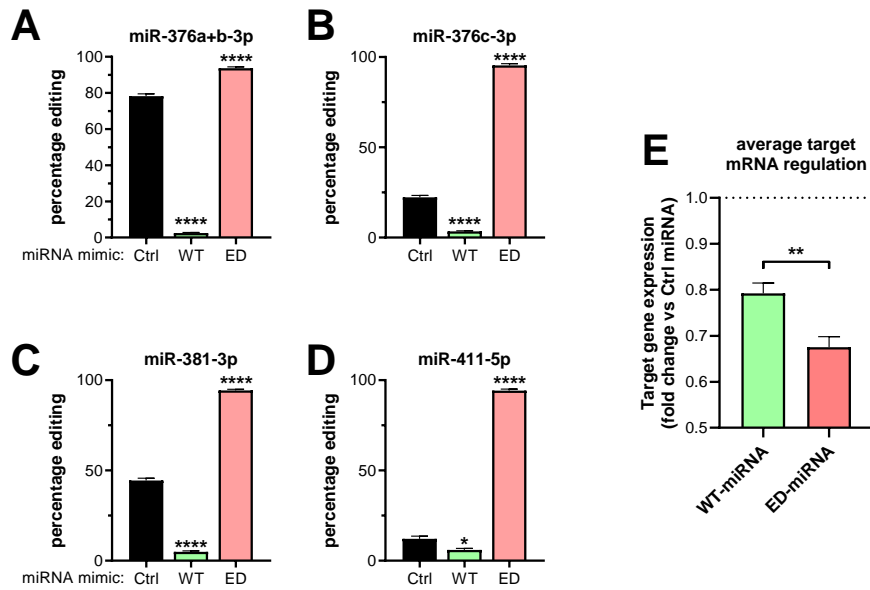

**Figure S5: Regulation of percentage miRNA editing and average target mRNA regulation after overexpression of either a WT-miRNA or an ED-miRNA.**

HUAF samples were transfected with 0.1  $\mu$ g of either a WT-miRNA mimic (WT), an ED-miRNA mimic (ED) or a control miRNA mimic (Ctrl). (A-D) Percentage editing was calculated afterwards using version specific qRT-PCR assays. In each case, overexpression of WT-miRNA successfully reduced overall percentage editing compared to Ctrl and overexpression of ED-miRNA successfully increased percentage editing. Data are presented as mean  $\pm$  SEM (n=3). \* $P$ <0.05, \*\*\*\* $P$ <0.0001 versus Ctrl mimic by 2-sided Student  $t$  test. (E) Average expression regulation of successful regulation of WT targets by WT-miRNA overexpression and ED targets by ED-miRNA overexpression shown in Figure 7C. Data are presented as mean  $\pm$  SEM. \*\* $P$ <0.001 by 2-sided Student  $t$  test.

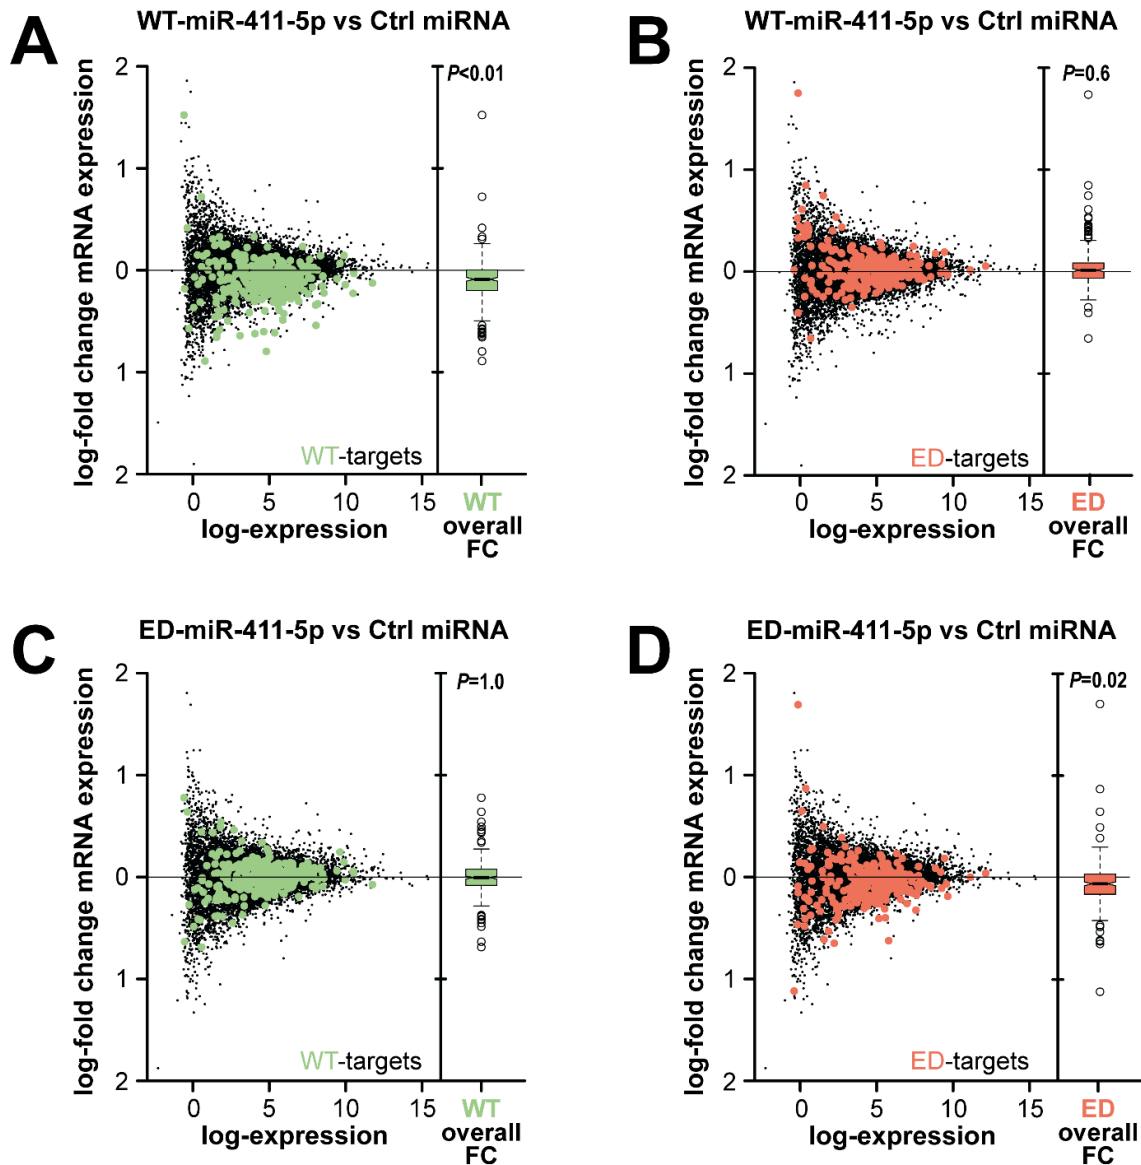

**Figure S6: Overall target gene regulation after overexpression of WT-miR-411-5p or ED-miR-411-5p.** The log-fold changes (FC) of mRNA expression calculated from RNA-seq data obtained after overexpression of WT-miR-411-5p (A&B) or ED-miR-411-5p (C&D) compared to overexpression of a non-targeting control microRNA (Ctrl miRNA) in HUAFs. Data represent averages of 3 independent experiments and are visualized using mean-difference plots, highlighting the predicted target genes (with a 0.5 binding score threshold to minimize false positives, see Supplemental Table VI) that were uniquely targeted by the WT-miR-411-5p (green, A&C) or ED-miR-411-5p (red, B&D). The overall distribution of the logFC per targetome is shown in the boxplots. Differential expression of each targetome was tested using ROAST<sup>2</sup>.



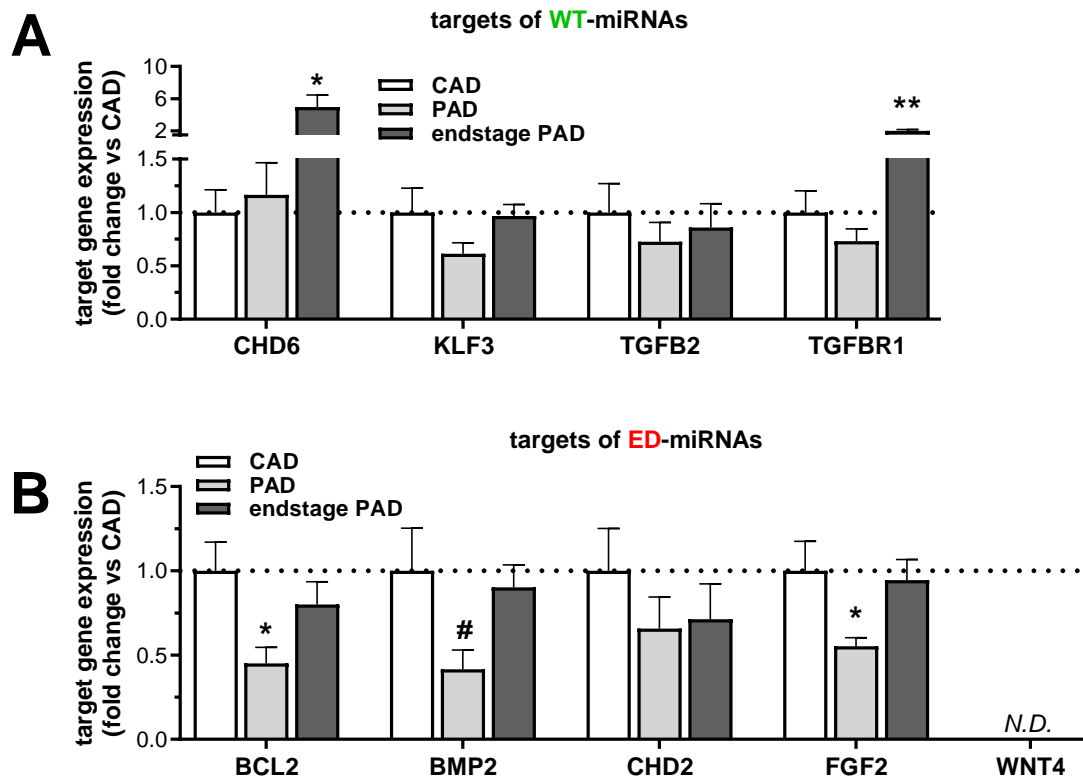

**Figure S7: Expression of validated WT-miRNA and ED-miRNA target gene in lower limb veins of patients with and without peripheral artery disease.** (A&B) Relative mRNA expression of genes we validated (see Figure 7B&C) to be targeted by the four selected WT-miRNAs (A) or ED-miRNAs (B) in lower leg vein (LLV) samples from different patient groups. LLV samples from patients with coronary artery disease (CAD) but not peripheral artery disease (PAD) (n=8) were compared to LLV samples from patients with severe PAD (n=6) and LLV samples from patients with end-stage PAD (n=8). Expression was normalized to stable household gene RPLP0 and expressed as fold change of the CAD group. Expression of WNT4 was not detected (N.D.) in these samples. Data is presented as mean  $\pm$ SEM. \*P<0.05, \*\*P<0.01; by 2-sided Student t test versus CAD.

### 1. Identification of mature microRNAs containing A-to-I editable adenosines

Method: search Pubmed for studies that identified microRNA editing events by analyzing small RNA sequencing datasets

Inclusion criteria: observed A-to-G mismatches in mature miRNA or pri-miRNA sequencing reads that are either reported by multiple studies or validated to be ADAR-dependent

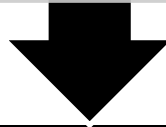

8 studies identified, 0 excluded

### 2. Remove microRNAs without previously reported link with vascular biology

Method: search each microRNA candidate in Pubmed with vascular search terms

Inclusion criteria: at least one search result that shows the microRNA is involved in or associated with cardiovascular functioning or disease

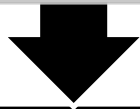

35 microRNAs identified as vasoactive, 25 excluded

### 3. Quantification of inferred mature miRNA editing in human major organs

Method: Reanalysis of high quality public RNA-seq datasets using miRgator webtool ([mirgator.kobic.re.kr](http://mirgator.kobic.re.kr))

Inclusion criteria: Per organ only the dataset with the highest read counts available were used.

**Figure S8: Identification of vasoactive microRNAs containing tissue specific A-to-I editing.** A schematic overview of the steps taken to identify vasoactive microRNAs that can be A-to-I edited in a tissue and context dependent manner, using manual literature curation and reanalysis of public RNA-seq datasets.

SUPPLEMENTAL TABLES

Table S1. MicroRNAs containing A-to-I editable adenosines

| #  | A-to-I editable miRNAs | Chromosome | Dominant side of miRNA duplex | Sequence and editable adenosines (A)       | Reported A-to-I edited in: | Linked to vascular functioning |
|----|------------------------|------------|-------------------------------|--------------------------------------------|----------------------------|--------------------------------|
| 1  | miR-376a1-3p           | 14         | 3p                            | AUCAU <b>AG</b> AGGAAAAUCCACGU             | 3-5                        | yes <sup>6</sup>               |
| 2  | miR-376a2-3p           | 14         | 3p                            | AUCAU <b>AG</b> AGGAAAAUCCACGU             | 3-5                        | yes <sup>6</sup>               |
| 3  | miR-376b-3p            | 14         | 3p                            | AUCAU <b>AG</b> AGGAAAAUCCAUGUU            | 4,5,7-9                    | yes <sup>10</sup>              |
| 4  | miR-376c-3p            | 14         | 3p                            | AACA <b>UAG</b> AGGAAAAUCCACGU             | 3-5,7-9,11,12              | yes <sup>13</sup>              |
| 5  | miR-381-3p             | 14         | 3p                            | UA <b>UACA</b> AGGGCAAGCUCUCUGU            | 4,5,7,8,11,12              | yes <sup>14</sup>              |
| 6  | miR-411-5p             | 14         | 5p                            | U <b>AGU</b> AGACCGUAUAGCGUACG             | 3-5,7-9,11,12              | yes <sup>15</sup>              |
| 7  | miR-376a2-5p           | 14         | 3p                            | GU <b>AGA</b> UUUUCUUAUGGU                 | 4,5,8,9,11,12              | yes <sup>16</sup>              |
| 8  | miR-605-3p             | 10         | 3p                            | AGA <b>AGC</b> ACUAUGAGAUUUAGA             | 4,5                        | yes <sup>17</sup>              |
| 9  | miR-624-3p             | 14         | 5p                            | CACA <b>AGG</b> UAUUGGUUUUACCU             | 4,5                        | yes <sup>18</sup>              |
| 10 | miR-487b-3p            | 14         | 3p                            | A <b>AUC</b> GUACAGGGUCAUCCACUU            | 4,19                       | yes <sup>20</sup>              |
| 11 | Let-7c-5p              | 21         | 5p                            | UGAGGU <b>AG</b> UAGGUUGU <b>A</b> UGGUU   | 4,5                        | yes <sup>21</sup>              |
| 12 | Let-7d-3p              | 9          | 5p                            | CU <b>AUAC</b> GACCUGCUGCCUUUCU            | 4,5,8                      | yes <sup>21</sup>              |
| 13 | Let-7e-3p              | 19         | 5p                            | CU <b>AUAC</b> GCCUCCUAGCUUUC              | 4,5,8                      | yes <sup>22</sup>              |
| 14 | miR-24-2-5p            | 19         | 3p                            | UGCC <b>UAC</b> UGAGCUGAAACACAG            | 4,5                        | yes <sup>23</sup>              |
| 15 | miR-27a-5p             | 19         | 3p                            | <b>AGGG</b> CUUAGCUGCUUGUGAGCA             | 4,5,11                     | yes <sup>24</sup>              |
| 16 | miR-27a-3p             | 19         | 3p                            | U <b>UCAC</b> AGUGGCUAAGUCCGC              | 4,5,8,11                   | yes <sup>21</sup>              |
| 17 | miR-98-5p              | X          | 5p                            | UGAGGU <b>AG</b> UA <b>A</b> GUUGUAUUGUU   | 4,5                        | yes <sup>25</sup>              |
| 18 | miR-99a-5p             | 21         | 5p                            | <b>AACCC</b> GUAGAUCCGAUCUUGUG             | 4,5,8,11,12                | yes <sup>26</sup>              |
| 19 | miR-130b-3p            | 22         | 3p                            | CAGUG <b>CAA</b> UGAUGAAAGGG <b>CA</b> U   | 4,5                        | yes <sup>27</sup>              |
| 20 | miR-151a-3p            | 8          | 5p                            | CU <b>AGAC</b> UGAAGCUCCUUGAGG             | 4,5,8,11,12                | yes <sup>18</sup>              |
| 21 | miR-200b-3p            | 1          | 3p                            | U <b>AAUAC</b> UGCCUGGUAAUGAUGA            | 4,5,8,11,12                | yes <sup>21</sup>              |
| 22 | miR-337-3p             | 14         | 3p                            | CUCC <b>UAU</b> UGAUGCCUUUCUUC             | 4,5,7,12                   | yes <sup>28</sup>              |
| 23 | miR-376a1-5p           | 14         | 3p                            | GU <b>AGA</b> UUCUCCUUAUGAGUA              | 4,5,8,9,11,12              | yes <sup>16</sup>              |
| 24 | miR-377-3p             | 14         | 3p                            | A <b>UCACACA</b> AGGCAACUUUGU              | 4,5                        | yes <sup>16</sup>              |
| 25 | miR-378a-3p            | 5          | 3p                            | ACUG <b>GAC</b> UUGGAGUC <b>AGA</b> AGGC   | 3-5,7                      | yes <sup>21</sup>              |
| 26 | miR-379-5p             | 14         | 5p                            | UGGU <b>AGAC</b> UAUGGAACGUAGG             | 4,5,7-9,11,12              | yes <sup>16</sup>              |
| 27 | miR-421-3p             | X          | 3p                            | A <b>UCAAC</b> AGACAU <b>AA</b> UUGGGCGC   | 4,5,7,8                    | yes <sup>29</sup>              |
| 28 | miR-455-5p             | 9          | 3p                            | U <b>AUGUG</b> CCUUUGGACU <b>AUC</b> G     | 4,5,8                      | yes <sup>30</sup>              |
| 29 | miR-494-3p             | 14         | 3p                            | UG <b>AAACA</b> UACACGGGAA <b>ACC</b> UC   | 4,31                       | yes <sup>20</sup>              |
| 30 | miR-497-5p             | 17         | 5p                            | <b>CAGCAG</b> CACUGUGGUUUUGU               | 4,5,7,8,11,12              | yes <sup>32</sup>              |
| 31 | miR-497-3p             | 17         | 5p                            | CA <b>AACC</b> CACUGUGGUGU <b>A</b>        | 3-5,7                      | yes <sup>21</sup>              |
| 32 | miR-503-5p             | X          | 5p                            | U <b>AGCAG</b> CGGAACAGUUCUGCAG            | 4,5                        | yes <sup>23</sup>              |
| 33 | miR-539-5p             | 14         | 3p                            | AG <b>AAAU</b> U <b>A</b> UCCUUGGUGUG      | 4,5,8                      | yes <sup>33</sup>              |
| 34 | miR-589-3p             | 7          | 5p                            | UC <b>AGAACA</b> AAUGCCGGU <b>UCC</b> CAGA | 4,5,8,12                   | yes <sup>34</sup>              |
| 35 | miR-1260b-5p           | 11         | 5p                            | AUCC <b>CA</b> CC <b>A</b> CUGCCACCAU      | 4,5                        | yes <sup>35</sup>              |
| 36 | miR-1251-5p            | 12         | 5p                            | ACU <b>CUAG</b> CUGCCAAAGGCGCU             | 4,5,7,12                   | no                             |
| 37 | miR-1295b-3p           | 1          | 5p                            | <b>AAUAGG</b> CC <b>A</b> CGGAUCUGGGCAA    | 4,12                       | no                             |
| 38 | miR-1301-3p            | 2          | 3p                            | UUG <b>CAGC</b> UGCCUGGGAGUGACUUC          | 4,5,12                     | no                             |
| 39 | miR-1304-3p            | 11         | 5p                            | UC <b>UCAC</b> UGUAGCCUCGAACCCC            | 4,5,12                     | no                             |
| 40 | miR-301a-3p            | 17         | 3p                            | CAGUG <b>CAA</b> UAGUAUUGUCA <b>A</b> AGC  | 4,5                        | no                             |
| 41 | miR-301b-3p            | 22         | 3p                            | CAGUG <b>CAA</b> UGAUUUGUCA <b>A</b> AGC   | 4,5                        | no                             |
| 42 | miR-3144-3p            | 6          | 5p                            | A <b>UAUAC</b> CUGUUCGGUCUCUUUA            | 4,12                       | no                             |
| 43 | miR-3157-3p            | 10         | 5p                            | CUGCC <b>CUA</b> GUCU <b>AG</b> CUGAAGCU   | 4,5                        | no                             |
| 44 | miR-3167-3p            | 11         | 5p                            | AG <b>GAUU</b> UC <b>A</b> GAAAUACUGGUGU   | 4,5                        | no                             |
| 45 | miR-3622a-3p           | 8          | 5p                            | U <b>CACC</b> UGACCUC <b>CA</b> UAGCCUGU   | 4,5,12                     | no                             |
| 46 | miR-3681-5p            | 2          | unclear                       | U <b>AGUGG</b> AUGAUGCACUCUGUGC            | 4,5                        | no                             |
| 47 | miR-378b-3p            | 3          | 3p                            | ACUG <b>GAC</b> UUGGAGGCAG <b>AA</b>       | 3-5                        | no                             |
| 48 | miR-378c-5p            | 10         | 5p                            | ACUG <b>GAC</b> UUGGAGUCAG <b>AA</b> AGUGG | 4,5                        | no                             |
| 49 | miR-4510-5p            | 15         | 5p                            | UGAGGG <b>AG</b> UAG <b>A</b> UGUAUGGUU    | 4,5                        | no                             |
| 50 | miR-4662a-5p           | 8          | 5p                            | UU <b>AGCC</b> AAUUGUCCAUCUUUAG            | 4,5                        | no                             |
| 51 | miR-488-3p             | 1          | 3p                            | UUG <b>AAAG</b> CUAUUUUCUUGGUC             | 4,5                        | no                             |
| 52 | miR-532-5p             | X          | 3p                            | CAUGCC <b>UU</b> GAGUGU <b>AG</b> GACCGU   | 4,5                        | no                             |
| 53 | miR-556-3p             | 1          | 5p                            | A <b>UAUU</b> ACC <b>A</b> UAGCUCAUCUUU    | 4,5                        | no                             |
| 54 | miR-561-3p             | 2          | 5p                            | CA <b>AGUU</b> U <b>A</b> AGAUCUUGAAGU     | 4,5                        | no                             |
| 55 | miR-598-3p             | 8          | 3p                            | U <b>ACGU</b> CAUCGUUGUCAUCGUCA            | 4,5,8                      | no                             |
| 56 | miR-625-3p             | 14         | 5p                            | GAC <b>UAU</b> AG <b>A</b> CUUUCCCCUCA     | 4,5                        | no                             |
| 57 | miR-6503-3p            | 11         | unclear                       | GGG <b>ACU</b> AGGAUGCAGACCUC              | 3-5,12                     | no                             |
| 58 | miR-664a-5p            | 1          | 3p                            | ACUG <b>GC</b> U <b>A</b> GGGAAAUGAUUGGAU  | 4,5,11,12                  | no                             |
| 59 | miR-944-3p             | 21         | 3p                            | <b>AAUU</b> A <b>U</b> GUACAUCGGAUGAG      | 4,5,11                     | no                             |
| 60 | miR-99b-3p             | 19         | 5p                            | <b>CAAGC</b> UCGUGUCUGUGGGUCCG             | 4,5                        | no                             |

MicroRNAs located in the 14q32 microRNA cluster have their chromosome number highlighted in blue. The seed sequence of each microRNA is highlighted in bold.

**Table S2. Seed sequence analysis of A-to-I edited pri-miRNAs**

| miRNA                    | WT-miRNA sequence and pri-miRNA A-to-I editing location | WT-miRNA seed | Seed sequence shared by | ED-miRNA seed    | Seed sequence shared by |
|--------------------------|---------------------------------------------------------|---------------|-------------------------|------------------|-------------------------|
| miR-376a1-5p             | GU <b>AGAUUC</b> UCCUUCUAUGAGUA                         | UAGAUUC       | none                    | UG <b>G</b> AUUC | none                    |
| miR-376a1-3p             | AUCAU <b>AG</b> AGGAAAAUCCACGU                          | UCAUAGA       | miR-376a2+b-3p          | UCAU <b>G</b> GA | none                    |
| miR-376a2-5p             | GGU <b>AGAUU</b> UCCUUCUAUGGU                           | GUAGAUU       | none                    | GU <b>G</b> GAUU | <i>miR-8056*</i>        |
| miR-376a2-3p             | AUCAU <b>AG</b> AGGAAAAUCCACGU                          | UCAUAGA       | miR-376a1+b-3p          | UCAU <b>G</b> GA | none                    |
| miR-376b-3p              | AUCAU <b>AG</b> AGGAAAAUCCAUGUU                         | UCAUAGA       | miR-376a1+a2-3p         | UCAU <b>G</b> GA | none                    |
| miR-376c-3p              | AACA <b>UAG</b> AGGAAAAUCCACGU                          | ACAUAGA       | none                    | ACAU <b>G</b> GA | <i>miR-4802-3P*</i>     |
| miR-381-3p               | UAU <b>ACA</b> AGGGCAAGCUCUCUGU                         | AUACAAG       | miR-300-3p              | AU <b>G</b> CAAG | none                    |
| miR-411-5p               | UAG <b>UAG</b> ACCGUAUAGCGUACG                          | AGUAGAC       | none                    | AGU <b>G</b> GAC | none                    |
| miR-605-3p               | AGA <b>AGG</b> CACUAUGAGAUUUAGA                         | GAAGGCA       | none                    | GA <b>G</b> GGCA | <i>miR-3616-3p*</i>     |
| miR-624-3p               | CACA <b>AGG</b> UAUUGGUUUACCU                           | ACAAGGU       | none                    | ACA <b>G</b> GGU | none                    |
| miR-487b-3p <sup>†</sup> | AA <b>UCGUAC</b> AGGGUCAUCCACUU                         | AUCGUAC       | none                    | <b>G</b> UCGUAC  | none                    |

\* unvalidated microRNA according to Targetscan<sup>36</sup>.

<sup>†</sup> characterized previously by Van der Kwast et al. 2018<sup>19</sup>.

**Table S3. Overview of the findings per selected microRNA**

|                                                                  | Experiment                                                  | Figure                     | Tissue               | miR-376a&b-3p                                                                    |                   |           | miR-376c-3p |                   |           | miR-381-3p |                   |           | miR-411-5p |                   |           |
|------------------------------------------------------------------|-------------------------------------------------------------|----------------------------|----------------------|----------------------------------------------------------------------------------|-------------------|-----------|-------------|-------------------|-----------|------------|-------------------|-----------|------------|-------------------|-----------|
|                                                                  |                                                             |                            |                      | WT                                                                               | ED                | % editing | WT          | ED                | % editing | WT         | ED                | % editing | WT         | ED                | % editing |
| regulation after 24h ischemia                                    | primary miRNA editing                                       | 2                          | HUVECs               | ≈                                                                                | ++                | +         | +           | +                 | +         | ++         | +                 | -         | +          | ++                | +         |
|                                                                  |                                                             |                            | HUAFs                | ≈                                                                                | ++                | +         | ++          | ++                | +         | +          | ++                | +         | +          | ++                | +         |
|                                                                  | mature miRNA editing                                        | 3                          | HUVECs               | ≈                                                                                | +                 | ≈         | ≈           | +                 | +         | +          | ≈                 | -         | +          | +                 | ≈         |
|                                                                  |                                                             |                            | HUAFs                | +                                                                                | ++                | +         | ++          | ++                | +         | +          | +                 | ≈         | +          | +                 | ≈         |
|                                                                  | AGO2 IP                                                     |                            | HUAFs                | +                                                                                | ++                | +         | ++          | ++                | +         | +          | ++                | +         | +          | +                 | ≈         |
|                                                                  | hindlimb ischemia<br>(adductor remains relatively normoxic) | 5                          | adductor             | excluded because edited adenosine is not conserved in the murine mmu-miR-376a-3p |                   |           | +           | ≈/-               | -         | ≈/+        | -                 | -         | ++         | ≈                 | ≈/-       |
|                                                                  |                                                             |                            | gastrocnemius soleus | ++                                                                               | +                 | -         | ≈           | ++                | +         | +          | ++                | ≈         | +          | +                 | ≈         |
| ex vivo culture                                                  | 6                                                           | IMA                        | +                    | ++                                                                               | +                 | +         | +           | ≈/+               | +         | +          | ≈                 | +         | +          | ≈/+               |           |
|                                                                  |                                                             | VSM                        | ≈/+                  | +                                                                                | ≈/+               | ≈         | +           | +                 | ≈         | ++         | +                 | +         | +          | ≈/+               |           |
| ischemic LLVs (PAD patients) versus normoxic LLVs (CAD patients) | 6                                                           | PAD patient LLVs           | ++                   | ++                                                                               | ≈/+               | +         | +           | +                 | +         | +          | +                 | ++        | ++         | ≈/+               |           |
|                                                                  |                                                             | end-stage PAD patient LLVs | +                    | ++                                                                               | ≈/+               | +         | ++          | ++                | +         | ++         | ++                | +         | ++         | +                 |           |
| role of ADARs                                                    | primary miRNA editing                                       | 4                          | HUAFs siADAR1        | ≈                                                                                | -                 | ≈         | -           | --                | -         | ≈/-        | --                | -         | -          | --                | -         |
|                                                                  |                                                             |                            | HUAFs siADAR2        | +                                                                                | -                 | -         | -           | -                 | ≈         | -          | -                 | ≈         | -          | ≈/-               | ≈         |
|                                                                  | mature miRNA editing                                        | 4                          | HUAFs siADAR1        | -                                                                                | ≈/-               | +         | -           | --                | -         | -          | --                | -         | -          | -                 | ≈         |
|                                                                  |                                                             |                            | HUAFs siADAR2        | ≈/-                                                                              | -                 | -         | -           | -                 | ≈         | ≈/-        | ≈/-               | ≈         | ≈          | ≈                 | ≈         |
|                                                                  |                                                             |                            | WT mimic             | ED mimic                                                                         | effect of editing | WT mimic  | ED mimic    | effect of editing | WT mimic  | ED mimic   | effect of editing | WT mimic  | ED mimic   | effect of editing |           |
| in vitro angio- genesis                                          | wound healing                                               | 8                          | HUAFs                | -                                                                                | +                 | ++        | -           | -                 | ≈         | ≈/-        | +                 | +         | ≈/-        | +                 | +         |
|                                                                  | tube formation                                              |                            | HUVECs               | ≈/-                                                                              | ≈/-               | ≈         | -           | ≈/+               | ++        | ≈/-        | +                 | +         | ≈/-        | +                 | +         |
|                                                                  | neovessel sprouting                                         |                            | aortic segments      | not conserved in mmu-miR-376a                                                    |                   |           | ≈/-         | +                 | ++        | ≈/+        | +                 | +         | ≈          | +                 | ++        |

**Table S4. Enriched pathways within putative targetomes\***

|                             | Total genes mapped to pathway | # of mapped genes in target set | Expected # of genes targeted | Fold Enrichment | <i>P</i> value |
|-----------------------------|-------------------------------|---------------------------------|------------------------------|-----------------|----------------|
| <b>WT-miR-376a+b-3p</b>     |                               |                                 |                              |                 |                |
| -                           |                               |                                 |                              |                 |                |
| <b>ED-miR-376a+b-3p</b>     |                               |                                 |                              |                 |                |
| Cadherin signalling pathway | 158                           | 24                              | 8.06                         | 2.98            | 0.0007         |
| Wnt signalling pathway      | 312                           | 34                              | 15.91                        | 2.14            | 0.0062         |
| <b>WT-miR-376c-3p</b>       |                               |                                 |                              |                 |                |
| -                           |                               |                                 |                              |                 |                |
| <b>ED-miR-376c-3p</b>       |                               |                                 |                              |                 |                |
| Cadherin signalling pathway | 158                           | 27                              | 11.87                        | 2.27            | 0.0395         |
| <b>WT-miR-381-3p</b>        |                               |                                 |                              |                 |                |
| -                           |                               |                                 |                              |                 |                |
| <b>ED-miR-381-3p</b>        |                               |                                 |                              |                 |                |
| Cadherin signalling pathway | 158                           | 25                              | 9.83                         | 2.54            | 0.0046         |
| Wnt signalling pathway      | 312                           | 43                              | 19.41                        | 2.22            | 0.0010         |
| <b>WT-miR-411-5p</b>        |                               |                                 |                              |                 |                |
| Cadherin signalling pathway | 158                           | 23                              | 4.94                         | 4.66            | 0.0000         |
| Wnt signalling pathway      | 312                           | 31                              | 9.76                         | 3.18            | 0.0000         |
| <b>ED-miR-411-5p</b>        |                               |                                 |                              |                 |                |
| -                           |                               |                                 |                              |                 |                |

\* Putative targetomes were analyzed by the PANTHER pathway algorithm<sup>37</sup>. Only pathway enrichments with  $P < 0.05$  after Bonferroni correction are reported.

**Table S5. Putative targets of WT-miRNAs or ED-miRNAs involved in one or more selected processes related to the response to ischemia**

See separate supplemental file.

**Table S6: Number of miR-411-5p targets detected using RNA-seq and regulation of the unique targets**

| Targetome                                                           | >0.5 binding score | Detected in RNA-seq | Unique to either targetome | Fraction down regulated | Fraction up regulated | Direction | P-Value | FDR   |
|---------------------------------------------------------------------|--------------------|---------------------|----------------------------|-------------------------|-----------------------|-----------|---------|-------|
| <b>WT-miR-411-5p overexpression vs Ctrl microRNA overexpression</b> |                    |                     |                            |                         |                       |           |         |       |
| WT                                                                  | 464                | 348                 | <b>300</b>                 | 0.3133                  | 0.0300                | Down      | 0.002   | 0.003 |
| ED                                                                  | 407                | 315                 | <b>274</b>                 | 0.0547                  | 0.0876                | Up        | 0.579   | 0.579 |
| <b>ED-miR-411-5p overexpression vs Ctrl microRNA overexpression</b> |                    |                     |                            |                         |                       |           |         |       |
| WT                                                                  | 464                | 348                 | <b>300</b>                 | 0.0733                  | 0.0767                | Down      | 0.987   | 0.987 |
| ED                                                                  | 407                | 315                 | <b>274</b>                 | 0.2299                  | 0.0657                | Down      | 0.022   | 0.043 |
| <b>ED-miR-411-5p overexpression vs WT-miR-411-5p overexpression</b> |                    |                     |                            |                         |                       |           |         |       |
| WT                                                                  | 464                | 348                 | <b>300</b>                 | 0.0300                  | 0.3333                | Up        | 0.001   | 0.001 |
| ED                                                                  | 407                | 315                 | <b>274</b>                 | 0.2482                  | 0.0438                | Down      | 0.013   | 0.013 |

Overall regulation of unique targets was examined using limma's roast function<sup>38</sup>



**Table S7: Number of targets within each targetome and fractions conserved in mice and detected by microarray**

| microRNA | target set | human | no cutoff          |     |                   |     | 0.5 score cutoff   |     |                   |     |
|----------|------------|-------|--------------------|-----|-------------------|-----|--------------------|-----|-------------------|-----|
|          |            |       | conserved in mouse |     | detected in array |     | conserved in mouse |     | detected in array |     |
| miR-376c | WT only    | 879   | 590                | 67% | 406               | 69% | 218                | 37% | 157               | 39% |
|          | ED only    | 1200  | 854                | 71% | 609               | 71% | 266                | 31% | 190               | 31% |
|          | shared     | 326   | 207                | 63% | 146               | 71% | 45                 | 22% | 36                | 25% |
| miR-381  | WT only    | 1259  | 959                | 76% | 698               | 73% | 509                | 53% | 376               | 54% |
|          | ED only    | 886   | 557                | 63% | 391               | 70% | 169                | 30% | 125               | 32% |
|          | shared     | 387   | 248                | 64% | 185               | 75% | 68                 | 27% | 51                | 28% |
| miR-411  | WT only    | 557   | 256                | 46% | 176               | 69% | 58                 | 23% | 43                | 24% |
|          | ED only    | 590   | 307                | 52% | 218               | 71% | 67                 | 22% | 49                | 22% |
|          | shared     | 85    | 37                 | 44% | 28                | 76% | 1                  | 3%  | 1                 | 4%  |

**Table S8: Primer sequences and purpose**

| Primer          | Used for:                        | Sequence (5' to 3')         |
|-----------------|----------------------------------|-----------------------------|
| pri-miR-let7c_F | amplification & sequencing       | TTGGAGGAGCTGACTGAAGAT       |
| pri-miR-let7c_R |                                  | ATGAAGAATTCTCGACGGCT        |
| pri-miR-let7d_F | amplification & sequencing       | TTGAAGTGCATCTGCCAAGT        |
| pri-miR-let7d_R |                                  | GCAAGGAAACAGGTTATCGGT       |
| pri-miR-let7e_F | amplification & sequencing       | TGGTCCCTGTCTGTCTGTCT        |
| pri-miR-let7e_R |                                  | TAAGGGTCCCTGAGTGGGG         |
| pri-miR-1260b_F | amplification & sequencing       | CAGGTGCTTACCGCAATCAG        |
| pri-miR-1260b_R |                                  | CTCCAAGCAGCAGCAACAG         |
| pri-miR-130b_F  | amplification & sequencing       | AGCCTGCATTCCAGGTCTCAG       |
| pri-miR-130b_R  |                                  | AGGCAGCAAGCTCCCTTTCC        |
| pri-miR-151a_F  | amplification & sequencing       | CTACAGTAGCTGAGCCTGGT        |
| pri-miR-151a_R  |                                  | AGGTTTGGGCAACACCGA          |
| pri-miR-200b_F  | amplification & sequencing       | CAGCTACTGAGCTTCCCAGC        |
| pri-miR-200b_R  |                                  | TCGGCCGGTTCGCTGC            |
| pri-miR-24-2_F  | amplification & sequencing       | CCGCCTGTCCCCTGC             |
| pri-miR-24-2_R  |                                  | CAGCCCACCCAGGGAAG           |
| pri-miR-27a_F   | amplification & sequencing       | CTGAGCTTGCCACCGAG           |
| pri-miR-27a_R   |                                  | GCAAGGCCAGAGGAGGTGAG        |
| pri-miR-337_F   | amplification & sequencing       | ATCCGAGCGCTTGCCTG           |
| pri-miR-337_R   |                                  | AAGGGTGCAGAGGAGGGTC         |
| pri-miR-376a1_F | amplification; qPCR & sequencing | TTTCTGATGACTCAAGCACAGG      |
| pri-miR-376a1_R |                                  | CGTCCTCCGAGGTTTCAAAG        |
| pri-miR-376a2_F | amplification & sequencing       | TTGTGTTTGTGATGGATTGTACTTAGG |
| pri-miR-376a2_R |                                  | CCTGATGGTGGCTTCAGTCC        |
| pri-miR-376b_F  | amplification & sequencing       | ACTGTGTTTCAGATTTGTCTTTCC    |
| pri-miR-376b_R  |                                  | TCAGGCCCTACGGTCTCTTC        |
| pri-miR-376c_F  | amplification & sequencing       | ATTTTGTATAGATTGTGCTTAGGTTT  |
| pri-miR-376c_R  |                                  | AGGAATGTTTCCAAGCAGCA        |
| pri-miR-377_F   | amplification & sequencing       | GGCATCTCGGTGTGTTCTTG        |
| pri-miR-377_R   |                                  | GGGGTGTAGATGCCCTGAG         |
| pri-miR-378a_F  | amplification & sequencing       | GGAGTGAGCGCTTGTATGG         |
| pri-miR-378a_R  |                                  | GTGGGGAAGGTGACTCCACT        |
| pri-miR-379_F   | amplification & sequencing       | GTGACGCCAACTTCAGGGG         |
| pri-miR-379_R   |                                  | GTTGGCAACACCTCCAGGAA        |
| pri-miR-381_F   | amplification & sequencing       | CCGTGAATGATAGTGAGAAC        |
| pri-miR-381_R   |                                  | ACACATACCGCATCCCTTG         |
| pri-miR-411_F   | amplification; qPCR & sequencing | AAGGCCTTGGAGGGCTTTCTG       |
| pri-miR-411_R   |                                  | GACAGCGTTGTTTCCAGGAGC       |
| pri-miR-487b_F  | amplification; qPCR & sequencing | GAAGACGTACCAAGTCCACCC       |
| pri-miR-487b_R  |                                  | GCTCCAGAGTCTGCGCTCTT        |
| pri-miR-494_F   | amplification & sequencing       | TTCGGCAGTTCTGTTTTGAT        |
| pri-miR-494_R   |                                  | TCCAGGGTGGGATTTGATACT       |
| pri-miR-497_F   | amplification & sequencing       | TGGGGTCTTCCCAGCACT          |
| pri-miR-497_R   |                                  | TCCCAGGGCCAAGCCTC           |
| pri-miR-503_F   | amplification & sequencing       | TATTCCTGGCTAGGCTGGGG        |
| pri-miR-503_R   |                                  | ACTTACCTGCTGGGTAGGC         |
| pri-miR-539_F   | amplification & sequencing       | TCACCATCTAACCTTGAGCCAAA     |
| pri-miR-539_R   |                                  | ATGGCGTCCAGGAAGTCTGC        |
| pri-miR-589_F   | amplification & sequencing       | AGCCTGAGAGACCGACCCT         |
| pri-miR-589_R   |                                  | GCAGAAGGCAGGAATCCAGAG       |
| pri-miR-605_F   | amplification & sequencing       | GAACCTTGGTAGAACTTTCACAGC    |
| pri-miR-605_R   |                                  | CTGTAACATAGGTAACCTGTATCTG   |
| pri-miR-624_F   | amplification & sequencing       | GGTTTTGTGTTCTTGTAATGAAAAA   |
| pri-miR-624_R   |                                  | ATCTTGTCTACTGAAACCACTT      |

|                                      |                                        |                                                                           |
|--------------------------------------|----------------------------------------|---------------------------------------------------------------------------|
| pri-miR-98_F<br>pri-miR-98_R         | amplification &<br>sequencing          | AAAGAGTCTGTCACCATGTAAAA<br>TGCTAAGACTAAGTGTGAATATGCC                      |
| pri-miR-99a_F<br>pri-miR-99a_R       | amplification &<br>sequencing          | TTTTGACTCTTAATTGCATCAGATA<br>GCACTGTGTATAGCATTTTTGTCA                     |
| pri-miR-376a2_F<br>pri-miR-376a2_R   | qPCR                                   | CGTGCTTTCGGGGATGAAAC<br>CAGTCCAGCCATGATCCCAA                              |
| pri-miR-376b_F<br>pri-miR-376b_R     | qPCR                                   | CAGAGCCCAGTCCTTCTTTG<br>CCTACGGTCTCTCCAGAAACA                             |
| pri-miR-376c_F<br>pri-miR-376c_R     | qPCR                                   | GGTTCATGCTTCCAGGACTCA<br>TCTCCCTGATGGTGGTTTCAG                            |
| pri-miR-381_F<br>pri-miR-381_R       | qPCR                                   | AACCTGCCCAGTGCTATTGTT<br>ACACACATACCGCATCCCTT                             |
| pri-miR-605_F<br>pri-miR-605_R       | qPCR                                   | TGTCTCTAGCCCTAGCTTGGTT<br>AGCAATATACCTGTGGCTGTCA                          |
| pri-miR-624_F<br>pri-miR-624_R       | qPCR                                   | AAAGTGGTTTTGTGTTCTTGTAATG<br>ACCACTTAGGTGTAATGCTATCTCA                    |
| U6-F<br>U6-R                         | qPCR                                   | AGAAGATTAGCATGGCCCCCT<br>ATTTTGCCTGTCATCCTTGCG                            |
| ADAR1_human_F<br>ADAR1_human_R       | qPCR                                   | GCTTGGGAACAGGGAATCGC<br>CGCAGTCTGGGAGTTGTATTTT                            |
| ADAR2_human_F<br>ADAR2_human_R       | qPCR                                   | GGAAGCTGCCTTGGGATCAG<br>GCTGCTGGAACTCATGTTTTCTTC                          |
| RPLP0_human_F<br>RPLP0_human_R       | qPCR                                   | TCCTCGTGGAAAGTGACATCG<br>TGCTGCTCCCACAATGAAAC                             |
| p53_F<br>p53_R                       | qPCR                                   | TGACACGCTTCCCTGGATTG<br>TTTTCAGGAAGTAGTTTCCATAGGT                         |
| VEGFa_F<br>VEGFa_R                   | qPCR                                   | ATCACCATGCAGATTATGCGG<br>CCCCTTCCCTTTCCTCGAAC                             |
| HIF1A_F<br>HIF1A_R                   | qPCR                                   | TGTCTCTAGCCCTAGCTTGGTT<br>AGCAATATACCTGTGGCTGTCA                          |
| Adar1p150_mouseF<br>Adar1p150_mouseR | qPCR                                   | GGCACTATGTCTCAAGGGTTC<br>CCTGTGGCTGCGGGTATC                               |
| Adar1p110_mouseF<br>Adar1p110_mouseR | qPCR                                   | TCACCAATCTGCGCCCTAAC<br>GTGTCTGGTGAGGGAACACC                              |
| Adar2_mouse_F<br>Adar2_mouse_R       | qPCR                                   | GCTTGCCCTGAAGGAGTTTTG<br>CAGTGCTGCTGGAACTCATATTC                          |
| Rplp0_mouse_F<br>Rplp0_mouse_R       | qPCR                                   | GCGACCTGGAAGTCCAATA<br>ATCTGCTGCATCTGCTTGG                                |
| ANGPT2_3'UTR_F<br>ANGPT2_3'UTR_R     | construct cloning (WT-<br>376a&b site) | CTCTCTCGAGTATCAACAGAAACGTGCCAT<br>CTGCGGCCGCGGGTGAATCTTGAGACATATAGC       |
| WNT4_3'UTR_F<br>WNT4_3'UTR_R         | construct cloning (ED-<br>376a&b site) | CTCTCTCGAGCTGAAGTCCCACCCTAGAACC<br>CTGCGGCCGCGTTTTGTCTGCTTCCAGGACT        |
| TGFBR2_3'UTR_F<br>TGFBR2_3'UTR_R     | construct cloning (WT-<br>376c site)   | CTCTCTCGAGACTGTTCTATAGTTTTTCAGGATCT<br>CTGCGGCCGCAATCAAACATGACCATGCTAATAA |
| CHD2_3'UTR_F<br>CHD2_3'UTR_R         | construct cloning (ED-<br>376c site)   | CTCTCTCGAGGGGGATGAGACCATGAGATT<br>CTGCGGCCGCTGTGCTAAGAACTTTTCTCCCT        |
| KLF3_3'UTR_F<br>KLF3_3'UTR_R         | construct cloning (WT-<br>381 site)    | CTCTCTCGAGATGAAGTTGCTCCGAGCTGTC<br>CTGCGGCCGCTCCCATTGGACTACAGAGTAGAAAC    |
| CHD6_3'UTR_F<br>CHD6_3'UTR_R         | construct cloning (WT-<br>411 site)    | CTCTCTCGAGTCTAAAAAGTCATGATTCCCCACT<br>CTGCGGCCGCGGCTCTGTTGGGCTAACG        |
| TGFB2_3'UTR_F<br>TGFB2_3'UTR_R       | construct cloning (WT-<br>411 site)    | CTCTCTCGAGTTTGCCACATCATTGCAGAAG<br>CTGCGGCCGCCCTATCTGAGAGGAAAATGTCTGC     |
| FGF2_3'UTR_F<br>FGF2_3'UTR_R         | construct cloning (ED-<br>411 site)    | CTCTCTCGAGTATTGCATCTGCTGTTACCCAG<br>CTGCGGCCGCGTCTGAGTATTCCGCAAC          |
| ANGPT2_F<br>ANGPT2_R                 | qPCR                                   | CAGCCCCTACGTGTCCAATG<br>GCCGTCTGGTTCTGTACTGC                              |

|          |      |                        |
|----------|------|------------------------|
| BMP2_F   |      | CCAGACCACCGGTTGGAG     |
| BMP2_R   | qPCR | AAACTCCTCCGTGGGGATAG   |
| WNT4_F   |      | GCTCCACACTCGACTCCTTG   |
| WNT4_R   | qPCR | CCCATGCACTGTCCTGTCAC   |
| TGFBR1_F |      | TCCTCGAGATAGGCCGTTTG   |
| TGFBR1_R | qPCR | CCAGTTCACAGGACCAAGG    |
| CHD2_F   |      | ATGCAAGACTGGATTCCTGAAG |
| CHD2_R   | qPCR | TCTCACGGCATAACCATGC    |
| BCL2_F   |      | AACATCGCCCTGTGGATGAC   |
| BCL2_R   | qPCR | GGGCCAAACTGAGCAGAGTC   |
| KLF3_F   |      | TGACCCAGTTCCTGTCAAGC   |
| KLF3_R   | qPCR | TGTATTCCGTGCGACAGACC   |
| CHD6_F   |      | GCTCTGGTTGCCATCCTTCTG  |
| CHD6_R   | qPCR | CCACCTTCGTCGTTGTAAGT   |
| TGFB2_F  |      | CCCTGCTGCACTTTTGTACC   |
| TGFB2_R  | qPCR | AGGAGATGTGGGGTCTTCCC   |
| FGF2_F   |      | ACCTGGCTATGAAGGAAGATGG |
| FGF2_R   | qPCR | CGTTTCAGTGCCACATACCAAC |

Gray highlighted sequences are primer extensions to flank the amplicon restriction enzyme sites

**Table S9. Sequences of custom ED-miRNA specific qRT-PCR assays**

| Assay target            | Component         | Sequence                                     |
|-------------------------|-------------------|----------------------------------------------|
| <b>ED-miR-376a+b-3p</b> | hairpin RT primer | GTGCTAACGTGTGCAGGGACGGAGGACACGTTAGCACACGTGG  |
|                         | qPCR primers      | CCGGCGATCATGGAGGAAAATC<br>TGCAGGGACGGAGGA    |
|                         | qPCR probe        | <VIC>ACGTTAGCACACGTGGAT<MGB>                 |
| <b>ED-miR-376c-3p</b>   | hairpin RT primer | GTCGTATCCAGTGCAGGGACCGAGGACTGGATACGACACGTGG  |
|                         | qPCR primers      | CCGGCGAACATGGAGGAAATTC<br>TGCAGGGACCGAGGA    |
|                         | qPCR probe        | <VIC>CTGGATACGACACGTGGAA<MGB>                |
| <b>ED-miR-381-3p</b>    | hairpin RT primer | GGCGTTGGCAGTGCAGGGTCCGAGGTCTGCCAACGCCACAGAG  |
|                         | qPCR primers      | GCCGTATGCAAGGGCAAGC<br>GTGCAGGGTCCGAGG       |
|                         | qPCR probe        | <VIC>CCAACGCCACAGAGAG<MGB>                   |
| <b>ED-miR-411-5p</b>    | hairpin RT primer | GTCGTATCCAGTGCAGGGACCGAGGACTGGATACGACCGTACGC |
|                         | qPCR primers      | CCGCCTAGTGGACCGTATAGC<br>TGCAGGGACCGAGGA     |
|                         | qPCR probe        | <VIC>CTGGATACGACCGTACGCT<MGB>                |

<VIC>, VIC fluorophore

<MGB>, minor groove binder

**Table S10: Sequences of siRNA and synthesized endogenous 3'UTRs**

| siRNA                                          | targets                                                                                                                                                                                                                                                                                                                                                                                                                                                                                                                                                                                                                                                                                                                                                                         | sequence                              |
|------------------------------------------------|---------------------------------------------------------------------------------------------------------------------------------------------------------------------------------------------------------------------------------------------------------------------------------------------------------------------------------------------------------------------------------------------------------------------------------------------------------------------------------------------------------------------------------------------------------------------------------------------------------------------------------------------------------------------------------------------------------------------------------------------------------------------------------|---------------------------------------|
| siADAR1                                        | ADAR1                                                                                                                                                                                                                                                                                                                                                                                                                                                                                                                                                                                                                                                                                                                                                                           | 5'-GCUAUUUUGCUGUCGUGUCA (dT) (dT) -3' |
| siADAR2                                        | ADAR2                                                                                                                                                                                                                                                                                                                                                                                                                                                                                                                                                                                                                                                                                                                                                                           | 5'-GAUCGUGGCCUUGCAUUA (dT) (dT) -3'   |
| siRNA control:                                 | nothing                                                                                                                                                                                                                                                                                                                                                                                                                                                                                                                                                                                                                                                                                                                                                                         | 5'-UCUCUCACAACGGGCAU (dT) (dT) -3'    |
| 3'UTR from                                     | sequence                                                                                                                                                                                                                                                                                                                                                                                                                                                                                                                                                                                                                                                                                                                                                                        |                                       |
| <b>BMP2</b><br>(ED-miR-376a+b-3p binding site) | <p>CTCTCTCTCGAGGGAAAAAATAGCTAATTTGTATTTATATGTAATCAAAGAAGTATCGGGTTTGTACA<br/>           TAATTTTCCAAAAATTGTAGTTGTTTTTCAGTTGTGTGTATTTAAGATGAAAAGTCTACATGGAAGGTTAC<br/>           TCTGGCAAAGTGCTTAGCACGTTTTGCTTTTTTGCAGTGCTACTGTTGAGTTCACAAGTCAAGTCCAGAA<br/>           AAAAAAAGTGGATAATCCACTCTGCTGACTTCAAGATTATTATATTATCAATTCTCAGGAATGTTGCA<br/>           GAGTGATTGTCCAA<b>TCCATGA</b>GAATTTACATCCTTATTAGGTGGAATATTTGGATAAGAACCAGACATTG<br/>           CTGATCTATTATAGAACTCTCCTCCTGCCCTTAATTTACAGAAAGAATAAAGCAGGATCCATAGAAAT<br/>           AATTAGGAAAACGATGAACCTGCAGGAAAGTGAATGATGGTTTGTGTTCTTCTTTCCATAAATTAGTGAT<br/>           CCCTTCAAAGGGGCTGATCTGGCCAAAGTATTCAATAAAAACGTAAGATTCTTTCATTATTGATATTGTGG<br/>           TCATATATATTTGCGGCCGCCTTCC</p>                             |                                       |
| <b>BCL2</b><br>(ED-miR-376c-3p binding sites)  | <p>CTCTCTCGAGTTTTTACATTATTAAGAAAAAAGATTTATTTATTTAAGACAGTCCCATCAAACCTCCTG<br/>           TCTTTGGAAATCCGACCACTAATTGCCAAGCACCCTTCGTGTGGCTCCACCTGGATGTTCTGTGCCTGT<br/>           AAACATAGATTGCTT<b>TCCATGT</b>TGTTGGCCGGATCACCATCTGAAGAGCAGACGGATGGAAAAAGGACC<br/>           TGATCATTGGGGAAGCTGGCTTTCTGGCTGCTGGAGGCTGGGAGAAGGTGTTCAATTCATTGCATTTCT<br/>           TTGCCCTGGGGATATTTAATGACAACCTTCTGGTTGGTAGGGACATCTGTTCTAAATGTTTATTATGTA<br/>           CAATACAGAAAAAATTTTATAAAATTAAGCAATGTGAACTGAATTGGAGAGTGATAATACAAGTCCCTT<br/>           TAGTCTTACCCAGTGAATCATTCTGT<b>TCCATGT</b>CCTTTGGACAACCATGACCTTGGACAATCATGAAATAT<br/>           GCATCTCACTGGATGCAAGAAAAATCAGATGGAGCATGAATGGTACTGTACCGGTTTCATCTGGACTGCC<br/>           CAGAAAAATAACTTCAAGCAAACATCCTAT<b>GCGGCCGCAG</b></p> |                                       |
| <b>BCL2</b><br>(ED-miR-381-3p binding sites)   | <p>CTCTCTCTCGAGTATCATTTATTTTTTACATTATTAAGAAAAAAGATTTATTTATTTAAGACAGTCCCA<br/>           TCAAACCTCCTGTCTTTGGAAATCCGACCACTAATTGCCAAGCACCCTTCGTGTGGCTCCACCTGGATG<br/>           TTCTGTGCCTGTAAACATAGATTGCTTTCCATGTTGTTGGCCGGATCACCATCTGAAGAGCAGACGGAT<br/>           GGAAAAAGGACCTGATCATTGGGGAAGCTGGCTTTCTGGCTGCTGGAGGCTGGGGAGAAGGTGTTTCATTC<br/> <b>CTTGCAT</b>TTCTTTGGCCCTGGGGGCTGTGATATTAACAGAGGGAGGGTTCCTGTGGGGGGAAGTCCATGC<br/>           CTCCCTGGCCTGAAGAAGAGACTCT<b>TTGCATA</b>TGACTCACATGAT<b>TGCATA</b>CCTGGTGGGAGGAAAAAGAT<br/>           TGGGAACCTTCAGATGGACCTAGTACCCACTGAGATTTCCACGCCGAAGGACAGCGATGGGAAAAATGCC<br/>           TAAATCATAGGAAAGTATTTTTTTAAGCTACCAATTTGCGCGAGAAAAGCATTTTAGCAATTTATACAA<br/>           TATCATCCAGTACCTTAAGCCCTGATT<b>GCGGCCGCCTTCC</b></p> |                                       |
| <b>ANGPT2</b><br>(ED-miR-381-3p binding sites) | <p>CTCTCTCGAGACATCCAGTCCACCTGAGGAACTGTCTCGAACTATTTTCAAAGACTTAAGCCCAGTGCA<br/>           CTGAAAGTCACGGCTGCGCACTGTGTCCTTCCACCACAGAGGGCGTGTGCTCGGTGCTGACGGGACCC<br/>           ACATGCTCCAGATTAGAGCCTGTAACTTTATCACTTAA<b>CTTGCAT</b>CACTTAACGGACCAAAGCAAGAC<br/>           CCTAAACATCCATAATTGTGATTAGACAGAACCCTATGCAAAGATGAACCCGAGGCTGAGAATCAGACT<br/>           GACAGTTTACAGACGCTGCTGTCACAACCAAGAATGTTATGTGCAAGTTTATCAGTAAATAACTGGAAAA<br/>           CAGAACACTTTATTATACATTTATTAGCCTTAGCAGGCAATAAACCAGAAATCACTTTGAAGACACAGCA<br/>           AAAAGTGATACACTCCGAGATCTGAAATAGATGTGTTCTCAGACAACAAAGTCCCTTCAGAATCTTCAT<br/> <b>GTTGCAT</b>AAATGTTATGAATATTAACAAgAAGTTGATTGAGAAAAGCGGCCGCAG</p>                                                                                           |                                       |

Gray highlighted sequences are non-endogenous extensions containing restriction enzyme sites for cloning. Colored highlights indicate miRNA binding sites.

## SUPPLEMENTAL REFERENCES

1. Pfaffl, MW (2001). A new mathematical model for relative quantification in real-time RT-PCR. *Nucleic Acids Res* **29**: e45.
2. Wu, D, Lim, E, Vaillant, F, Asselin-Labat, ML, Visvader, JE, and Smyth, GK (2010). ROAST: rotation gene set tests for complex microarray experiments. *Bioinformatics (Oxford, England)* **26**: 2176-2182.
3. Zheng, Y, Li, T, Ren, R, Shi, D, and Wang, S (2014). Revealing editing and SNPs of microRNAs in colon tissues by analyzing high-throughput sequencing profiles of small RNAs. *BMC Genomics* **15 Suppl 9**: S11.
4. Li, L, Song, Y, Shi, X, Liu, J, Xiong, S, Chen, W, Fu, Q, Huang, Z, Gu, N, and Zhang, R (2018). The landscape of miRNA editing in animals and its impact on miRNA biogenesis and targeting. *Genome Res* **28**: 132-143.
5. Pinto, Y, Buchumenski, I, Levanon, EY, and Eisenberg, E (2018). Human cancer tissues exhibit reduced A-to-I editing of miRNAs coupled with elevated editing of their targets. *Nucleic Acids Res* **46**: 71-82.
6. Su, Q, Li, L, Zhao, J, Sun, Y, and Yang, H (2017). MiRNA Expression Profile of the Myocardial Tissue of Pigs with Coronary Microembolization. *Cellular physiology and biochemistry : international journal of experimental cellular physiology, biochemistry, and pharmacology* **43**: 1012-1024.
7. Chiang, HR, Schoenfeld, LW, Ruby, JG, Auyeung, VC, Spies, N, Baek, D, Johnston, WK, Russ, C, Luo, S, Babiarz, JE, *et al.* (2010). Mammalian microRNAs: experimental evaluation of novel and previously annotated genes. *Genes & development* **24**: 992-1009.
8. Alon, S, Mor, E, Vigneault, F, Church, GM, Locatelli, F, Galeano, F, Gallo, A, Shomron, N, and Eisenberg, E (2012). Systematic identification of edited microRNAs in the human brain. *Genome Res* **22**: 1533-1540.
9. Ekdahl, Y, Farahani, HS, Behm, M, Lagergren, J, and Ohman, M (2012). A-to-I editing of microRNAs in the mammalian brain increases during development. *Genome Res* **22**: 1477-1487.
10. Korkmaz, G, le Sage, C, Tekirdag, KA, Agami, R, and Gozuacik, D (2012). miR-376b controls starvation and mTOR inhibition-related autophagy by targeting ATG4C and BECN1. *Autophagy* **8**: 165-176.
11. Gong, J, Wu, Y, Zhang, X, Liao, Y, Sibanda, VL, Liu, W, and Guo, AY (2014). Comprehensive analysis of human small RNA sequencing data provides insights into expression profiles and miRNA editing. *RNA Biol* **11**: 1375-1385.
12. Wang, Y, Xu, X, Yu, S, Jeong, KJ, Zhou, Z, Han, L, Tsang, YH, Li, J, Chen, H, Mangala, LS, *et al.* (2017). Systematic characterization of A-to-I RNA editing hotspots in microRNAs across human cancers. *Genome Res* **27**: 1112-1125.
13. Edelstein, LC, Simon, LM, Montoya, RT, Holinstat, M, Chen, ES, Bergeron, A, Kong, X, Nagalla, S, Mohandas, N, Cohen, DE, *et al.* (2013). Racial differences in human platelet PAR4 reactivity reflect expression of PCTP and miR-376c. *Nat Med* **19**: 1609-1616.
14. Liu, L, Yao, J, Li, Z, Zu, G, Feng, D, Li, Y, Qasim, W, Zhang, S, Li, T, Zeng, H, *et al.* (2018). miR-381-3p knockdown improves intestinal epithelial proliferation and barrier function after intestinal ischemia/reperfusion injury by targeting nurr1. *Cell death & disease* **9**: 411.
15. Stather, PW, Sylvius, N, Sidloff, DA, Dattani, N, Verissimo, A, Wild, JB, Butt, HZ, Choke, E, Sayers, RD, and Bown, MJ (2015). Identification of microRNAs associated with abdominal aortic aneurysms and peripheral arterial disease. *The British journal of surgery* **102**: 755-766.
16. Welten, SM, Goossens, EA, Quax, PH, and Nossent, AY (2016). The multifactorial nature of microRNAs in vascular remodelling. *Cardiovascular research* **110**: 6-22.
17. Xiang, Y, Guo, J, Peng, YF, Tan, T, Huang, HT, Luo, HC, and Wei, YS (2017). Association of miR-21, miR-126 and miR-605 gene polymorphisms with ischemic stroke risk. *Oncotarget* **8**: 95755-95763.
18. McManus, DD, and Freedman, JE (2015). MicroRNAs in platelet function and cardiovascular disease. *Nature reviews Cardiology* **12**: 711-717.
19. van der Kwast, RVCT, van Ingen, E, Parma, L, Peters, HAB, Quax, PHA, and Nossent, AY (2018). Adenosine-to-Inosine Editing of MicroRNA-487b Alters Target Gene Selection After Ischemia and Promotes Neovascularization. *Circ Res* **122**: 444-456.
20. Welten, SM, Bastiaansen, AJ, de, JR, de Vries, MR, Peters, EH, Boonstra, M, Sheikh, SP, La, MN, Kandimalla, ER, Quax, PH, *et al.* (2014). Inhibition of 14q32 MicroRNAs miR-329, miR-487b, miR-494 and miR-495 Increases Neovascularization and Blood Flow Recovery after Ischemia. *Circ Res*.
21. Romaine, SP, Tomaszewski, M, Condorelli, G, and Samani, NJ (2015). MicroRNAs in cardiovascular disease: an introduction for clinicians. *Heart (British Cardiac Society)* **101**: 921-928.
22. Lin, Z, Ge, J, Wang, Z, Ren, J, Wang, X, Xiong, H, Gao, J, Zhang, Y, and Zhang, Q (2017). Let-7e modulates the inflammatory response in vascular endothelial cells through ceRNA crosstalk. *Scientific reports* **7**: 42498.

23. Condorelli, G, Latronico, MV, and Cavarretta, E (2014). microRNAs in cardiovascular diseases: current knowledge and the road ahead. *J Am Coll Cardiol* **63**: 2177-2187.
24. Feinberg, MW, and Moore, KJ (2016). MicroRNA Regulation of Atherosclerosis. *Circ Res* **118**: 703-720.
25. Li, HW, Meng, Y, Xie, Q, Yi, WJ, Lai, XL, Bian, Q, Wang, J, Wang, JF, and Yu, G (2015). miR-98 protects endothelial cells against hypoxia/reoxygenation induced-apoptosis by targeting caspase-3. *Biochem Biophys Res Commun* **467**: 595-601.
26. Bao, MH, Li, JM, Luo, HQ, Tang, L, Lv, QL, Li, GY, and Zhou, HH (2016). NF-kappaB-Regulated miR-99a Modulates Endothelial Cell Inflammation. *Mediators of inflammation* **2016**: 5308170.
27. Olson, EN (2014). MicroRNAs as therapeutic targets and biomarkers of cardiovascular disease. *Science translational medicine* **6**: 239ps233.
28. Wang, X, Suofu, Y, Akpınar, B, Baranov, SV, Kim, J, Carlisle, DL, Zhang, Y, and Friedlander, RM (2017). Systemic antimiR-337-3p delivery inhibits cerebral ischemia-mediated injury. *Neurobiology of disease* **105**: 156-163.
29. Marchand, A, Proust, C, Morange, PE, Lompre, AM, and Tregouet, DA (2012). miR-421 and miR-30c inhibit SERPINE 1 gene expression in human endothelial cells. *PLoS One* **7**: e44532.
30. Shoshan, E, Mobley, AK, Braeuer, RR, Kamiya, T, Huang, L, Vasquez, ME, Salameh, A, Lee, HJ, Kim, SJ, Ivan, C, *et al.* (2015). Reduced adenosine-to-inosine miR-455-5p editing promotes melanoma growth and metastasis. *Nat Cell Biol* **17**: 311-321.
31. Voellenkle, C, Rooij, J, Guffanti, A, Brini, E, Fasanaro, P, Isaia, E, Croft, L, David, M, Capogrossi, MC, Moles, A, *et al.* (2012). Deep-sequencing of endothelial cells exposed to hypoxia reveals the complexity of known and novel microRNAs. *Rna* **18**: 472-484.
32. Su, SH, Wu, CH, Chiu, YL, Chang, SJ, Lo, HH, Liao, KH, Tsai, CF, Tsai, TN, Lin, CH, Cheng, SM, *et al.* (2017). Dysregulation of Vascular Endothelial Growth Factor Receptor-2 by Multiple miRNAs in Endothelial Colony-Forming Cells of Coronary Artery Disease. *Journal of vascular research* **54**: 22-32.
33. Hui, J, Huishan, W, Tao, L, Zhonglu, Y, Renteng, Z, and Hongguang, H (2017). miR-539 as a key negative regulator of the MEK pathway in myocardial infarction. *Herz* **42**: 781-789.
34. Qiang, L, Hong, L, Ningfu, W, Huaihong, C, and Jing, W (2013). Expression of miR-126 and miR-508-5p in endothelial progenitor cells is associated with the prognosis of chronic heart failure patients. *International journal of cardiology* **168**: 2082-2088.
35. Cheuk, BL, and Cheng, SW (2014). Identification and characterization of microRNAs in vascular smooth muscle cells from patients with abdominal aortic aneurysms. *Journal of vascular surgery* **59**: 202-209.
36. Agarwal, V, Bell, GW, Nam, JW, and Bartel, DP (2015). Predicting effective microRNA target sites in mammalian mRNAs. *eLife* **4**.
37. Mi, H, Huang, X, Muruganujan, A, Tang, H, Mills, C, Kang, D, and Thomas, PD (2017). PANTHER version 11: expanded annotation data from Gene Ontology and Reactome pathways, and data analysis tool enhancements. *Nucleic Acids Res* **45**: D183-D189.
38. Ritchie, ME, Phipson, B, Wu, D, Hu, Y, Law, CW, Shi, W, and Smyth, GK (2015). limma powers differential expression analyses for RNA-sequencing and microarray studies. *Nucleic Acids Res* **43**: e47.
